# Decoding across sensory modalities reveals common supramodal signatures of conscious perception

Gaëtan Sanchez<sup>1,2,3</sup>, Thomas Hartmann<sup>1,2</sup>, Marco Fusca<sup>1,2</sup>, Gianpaolo Demarchi<sup>1,2</sup> and  
Nathan Weisz<sup>1,2</sup>

1 – Paris-Lodron Universität Salzburg, Centre for Cognitive Neuroscience and Division of Physiological  
Psychology, Hellbrunnerstraße 34, 5020 Salzburg, Austria

2 – Center for Mind/Brain Sciences (CIMEC), University of Trento, via delle Regole 101, 38123 Mattarello (TN),  
Italy

3 – Lyon Neuroscience Research Center (CRNL), Inserm U1028, CNRS UMR5292, University Lyon 1, Centre  
Hospitalier Le Vinatier - Bât. 452, 95 boulevard Pinel, 69675 Bron, France

\* Corresponding author: [gaetan.sanchez@inserm.fr](mailto:gaetan.sanchez@inserm.fr)

## Keywords

consciousness; perception; near-threshold stimulation; multivariate analysis; decoding  
analysis; magnetoencephalography

## Abstract

An increasing number of studies highlight common brain regions and processes in mediating conscious sensory experience. While most studies have been performed in the visual modality, it is implicitly assumed that similar processes are involved in other sensory modalities. However, the existence of supramodal neural processes related to conscious perception has not been convincingly shown so far. Here, we aim to directly address this issue by investigating whether neural correlates of conscious perception in one modality can predict conscious perception in a different modality. In two separate experiments, we presented participants with successive blocks of near-threshold tasks involving tactile, visual or auditory stimuli during the same magnetoencephalography (MEG) acquisition. Using decoding analysis in the post-stimulus period between sensory modalities, our first experiment uncovered supramodal spatio-temporal neural activity patterns predicting conscious perception of the feeble stimulation. Strikingly, these supramodal patterns included activity in primary sensory regions not directly relevant to the task (e.g. neural activity in visual cortex predicting conscious perception of auditory near-threshold stimulation). We carefully replicate our results in a control experiment that furthermore show that the relevant patterns are independent of the type of report (i.e. whether conscious perception was reported by pressing or withholding a button-press). Using standard paradigms for probing neural correlates of conscious perception, our findings reveal a common signature of conscious access across sensory modalities and illustrate the temporally late and widespread broadcasting of neural representations, even into task-unrelated primary sensory processing regions.

39

## 40 **Introduction**

41           While the brain can process an enormous amount of sensory information in parallel,  
42 only some information can be consciously accessed, playing an important role in the way we  
43 perceive and act in our surrounding environment. An outstanding goal in cognitive  
44 neuroscience is thus to understand the relationship between neurophysiological processes  
45 and conscious experiences. However, despite tremendous research efforts, the precise brain  
46 dynamics that enable certain sensory information to be consciously accessed remain  
47 unresolved. Nevertheless, progress has been made in research focusing on isolating neural  
48 correlates of conscious perception (1), in particular suggesting that conscious perception - at  
49 least if operationalized as reportability (2) - of external stimuli crucially depends on the  
50 engagement of a widely distributed brain network (3). To study neural processes underlying  
51 conscious perception, neuroscientists often expose participants to near-threshold (NT) stimuli  
52 that are matched to their individual perceptual thresholds (4). In NT experiments, there is a  
53 trial-to-trial variability in which around 50% of the stimuli at NT-intensity are consciously  
54 perceived. Because of the fixed intensity, the physical differences between stimuli within the  
55 same modality can be excluded as a determining factor leading to reportable sensation (5).  
56 Despite numerous methods used to investigate conscious perception of external events, most  
57 studies target a single sensory modality. However, any specific neural pattern identified as a  
58 correlate of consciousness needs evidence that it generalizes to some extent, e.g. across  
59 sensory modalities. We argue that this has not been convincingly shown so far.

60           In the visual domain, it has been shown that reportable conscious experience is present  
61 when primary visual cortical activity extends towards hierarchically downstream brain areas  
62 (6), requiring the activation of frontoparietal regions in order to become fully reportable (7).  
63 Nevertheless, a recent MEG study using a visual masking task revealed early activity in  
64 primary visual cortices as the best predictor for conscious perception (8). Other studies have  
65 shown that neural correlates of auditory consciousness relate to the activation of fronto-  
66 temporal rather than fronto-parietal networks (9, 10). Additionally, recurrent processing

67 between primary, secondary somatosensory and premotor cortices have been suggested as  
68 potential neural signatures of tactile conscious perception (11, 12). Indeed, recurrent  
69 processing between higher and lower order cortical regions within a specific sensory system  
70 is theorized to be a marker of conscious processing (6, 13, 14). Moreover, alternative theories  
71 such as the global workspace framework (15) extended by Dehaene et al. (16) postulates that  
72 the frontoparietal engagement aids in 'broadcasting' relevant information throughout the brain,  
73 making it available to various cognitive modules. In various electrophysiological experiments,  
74 it has been shown that this process is relatively late (~300 ms), and could be related to  
75 increased evoked brain activity after stimulus onset such as the so-called P300 signal (17–  
76 19). Such late brain activities seem to correlate with perceptual consciousness and could  
77 reflect the global broadcasting of an integrated stimulus making it conscious. Taken together,  
78 theories and experimental findings argue in favor of various 'signatures' of consciousness from  
79 recurrent activity within sensory regions to a global broadcasting of information with  
80 engagement of fronto-parietal areas. Even though usually implicitly assumed, it is so far  
81 unclear whether similar spatio-temporal neural activity patterns are linked to conscious access  
82 across different sensory modalities.

83 In the current study, we investigated conscious perception in different sensory systems  
84 using multivariate analysis on MEG data. Our working assumption is that brain activity related  
85 to conscious access has to be independent from the sensory modality: i.e. supramodal  
86 consciousness-related neural processes need to exhibit spatio-temporal generalization. Such  
87 a hypothesis is most ideally tested applying decoding methods to electrophysiological signals  
88 recorded while probing conscious access in different sensory modalities. The application of  
89 multivariate pattern analysis (MVPA) to EEG/MEG measurements offers increased sensitivity  
90 in detecting experimental effects distributed over space and time (20–23). MVPA is often used  
91 in combination with a searchlight method (24, 25), which involves sliding a small spatial  
92 window over the data to reveal areas containing decodable information. The combination of  
93 both methods provides spatio-temporal detection of optimal decodability, determining where,  
94 when and for how long a specific pattern is present in brain activity. Such multivariate decoding

95 analyses have been proposed as an alternative in consciousness research, complementing  
96 other conventional univariate approaches in order to identify neural activity predictive of  
97 conscious experience at the single trial level (26).

98 Here, we acquired MEG data while each participant performed three different standard  
99 NT tasks on three sensory modalities with the aim of characterizing supramodal brain  
100 mechanisms of conscious perception. In the first experiment we show how neural patterns  
101 related to perceptual consciousness can be generalized over space and time within and –most  
102 importantly- between different sensory systems by using classification analysis on source-  
103 level reconstructed brain activity. In an additional control experiment, we replicate the main  
104 findings and exclude the possibility that our observed patterns are due to response preparation  
105 / selection.

106

## 107 **Materials and Methods**

### 108 Participants

109 Twenty-five healthy volunteers took part in the initial experiment conducted in Trento  
110 and twenty-one healthy volunteers took part in the control experiment performed in Salzburg.  
111 All participants presented normal or corrected-to-normal vision and no neurological or  
112 psychiatric disorders. Three participants for the initial experiment and one participant for the  
113 control experiment were excluded from the analysis due to excessive artifacts in the MEG data  
114 leading to an insufficient number of trials per condition after artifact rejection (less than 30  
115 trials for at least one condition). Additionally, within each experiment six participants were  
116 discarded from the analysis because false alarms rate exceeded 30% and/or near-threshold  
117 detection rate was over 85% or below 15% for at least one sensory modality (due to threshold  
118 identification failure and difficulty to use response button mapping during the control  
119 experiment, also leaving less than 30 trials for at least one relevant condition in one sensory  
120 modality: detected or undetected). The remaining 16 participants (11 females, mean age: 28.8  
121 years; SD: 3.4 years) for the initial experiment and 14 participants (9 females, mean age: 26.4

122 years; SD: 6.4 years) for the control experiment, reported normal tactile and auditory  
123 perception. The ethics committee of the University of Trento and University of Salzburg  
124 respectively, approved the experimental protocols that were used with the written informed  
125 consent of each participant.

126

### 127 Stimuli

128 To ensure that the participant did not hear any auditory cues caused by the piezo-  
129 electric stimulator during tactile stimulation, binaural white noise was presented during the  
130 entire experiment (training blocks included). Auditory stimuli were presented binaurally using  
131 MEG-compatible tubal in-ear headphones (SOUNDPixx, VPixx technologies, Canada). Short  
132 bursts of white noise with a length of 50 ms were generated with Matlab and multiplied with a  
133 Hanning window to obtain a soft on- and offset. Participants had to detect short white noise  
134 bursts presented near hearing threshold (27). The intensity of such transient target auditory  
135 stimuli was determined prior to the experiment in order to emerge from the background  
136 constant white noise stimulation. Visual stimuli were Gabor ellipsoid (tilted 45°) back-projected  
137 on a translucent screen by a Propixx DLP projector (VPixx technologies, Canada) at a refresh  
138 rate of 180 frames per second. The stimuli were presented 50 ms in the center of the screen  
139 at a viewing distance of 110 cm. Tactile stimuli were delivered with a 50 ms stimulation to the  
140 tip of the left index finger, using one finger module of a piezo-electric stimulator (Quaerosys,  
141 Schotten, Germany) with 2 × 4 rods, which can be raised to a maximum of 1 mm. The module  
142 was attached to the finger with tape and the participant's left hand was cushioned to prevent  
143 any unintended pressure on the module (28). For the control experiment (conducted in another  
144 laboratory; i.e. Salzburg), visual, auditory and tactile stimulation setups were identical but we  
145 used a different MEG/MRI vibrotactile stimulator system (CM3, Cortical Metrics).

146

### 147 Task and design

148 The participants performed three blocks of a NT perception task. Each block included  
149 three separate runs (100 trials each) for each sensory modality, tactile (T), auditory (A) and

150 visual (V). A short break (~1 min) separated each run and longer breaks (~4 min) were  
151 provided to the participants after each block. Inside a block, runs alternated in the same order  
152 within subject and were pseudo-randomized across subjects (i.e. subject 1 = TVA-TVA-TVA;  
153 subject 2 = VAT-VAT-VAT; ...). Participants were asked to fixate on a central white dot in a  
154 grey central circle at the center of the screen throughout the whole experiment to minimize  
155 eye movements.

156 A short training run with 20 trials was conducted to ensure that participants had  
157 understood the task. Then, in three different training sessions prior to the main experiment,  
158 participants' individual perceptual thresholds (tactile, auditory and visual) were determined in  
159 the shielded room. For the initial experiment, a 1-up/1-down staircase procedure with two  
160 randomly interleaved staircases (one up- and one downward) was used with fixed step sizes.  
161 For the control experiment we used a Bayesian active sampling protocol to estimate  
162 psychometric slope and threshold for each participant (60).

163 The main experiment consisted of a detection task (Figure 1A). At the beginning of  
164 each run, participants were told that on each trial a weak stimulus (tactile, auditory or visual  
165 depending on the run) could be presented at random time intervals. 500 ms after the target  
166 stimulus onset, participants were prompted to indicate whether they had felt the stimulus with  
167 an on-screen question mark (maximal response time: 2 s). Responses were given using MEG-  
168 compatible response boxes with the right index finger and the middle finger (response button  
169 mapping was counterbalanced among participants). Trials were then classified into hits  
170 (detected) and misses (undetected stimulus) according to the participants' answers. Trials with  
171 no response were rejected. Catch (above perceptual threshold stimulation intensity) and Sham  
172 (absent stimulation) trials were used to control false alarms and correct rejection rates across  
173 the experiment. Overall, there were 9 runs with 100 trials each (in total 300 trials for each  
174 sensory modality). Each trial started with a variable interval (1.3–1.8 s, randomly-distributed)  
175 followed by an experimental near-threshold stimulus (80 per run), a sham stimulus (10 per  
176 run) or a catch stimulus (10 per run) of 50 ms each. Each run lasted for approximately 5 min.  
177 The whole experiment lasted for ~1h.

178 Identical timing parameters were used in the control experiment. However, a specific  
179 response screen design was used to control for motor response mapping. For each trial the  
180 participants must use a different response mapping related to circle's color surrounding the  
181 question mark during response screen. Two colors (blue or yellow) were used and presented  
182 randomly after each trial during the control experiment. One color was associated to the  
183 following response mapping rule: "press the button only if there is a stimulation" (for near-  
184 threshold condition: "detected") and the other color was associated to the opposite response  
185 mapping: "press a button only if there is no stimulation" (for near-threshold condition:  
186 "undetected"). The association between one response mapping and a specific color (blue or  
187 yellow) was fixed for a single participant but was predefined randomly across different  
188 participant. Importantly, by delaying the response-mapping to after the stimulus presentation  
189 in a -for the individual- unpredictable manner, neural patterns during relevant periods  
190 putatively cannot be confounded by response selection / preparation. Both experiments were  
191 programmed in Matlab using the open source Psychophysics Toolbox (61).

192

### 193 MEG data acquisition and preprocessing

194 MEG was recorded at a sampling rate of 1kHz using a 306-channel (204 first order  
195 planar gradiometers, 102 magnetometers) VectorView MEG system for the first experiment in  
196 Trento, and Triux MEG system for the control experiment in Salzburg (Elekta-Neuromag Ltd.,  
197 Helsinki, Finland) in a magnetically shielded room (AK3B, Vakuumschmelze, Hanau,  
198 Germany). Before the experiments, individual head shapes were acquired for each participant  
199 including fiducials (nasion, pre-auricular points) and around 300 digitized points on the scalp  
200 with a Polhemus Fastrak digitizer (Polhemus, Vermont, USA). Head positions of the individual  
201 relative to the MEG sensors were continuously controlled within a run using five coils. Head  
202 movements did not exceed 1 cm within and between blocks.

203 Data were analyzed using the Fieldtrip toolbox (62) and the CoSMoMVPA toolbox (63)  
204 in combination with MATLAB 8.5 (MathWorks Natick, MA). First, a high-pass filter at 0.1 Hz  
205 (FIR filter with transition bandwidth 0.1Hz) was applied to the continuous data. Then the data

206 were segmented from 1000 ms before to 1000 ms after target stimulation onset and down-  
207 sampled to 512 Hz. Trials containing physiological or acquisition artifacts were rejected. A  
208 semi-automatic artifact detection routine identified statistical outliers of trials and channels in  
209 the datasets using a set of different summary statistics (variance, maximum absolute  
210 amplitude, maximum z-value). These trials and channels were removed from each dataset.  
211 Finally, the data were visually inspected and any remaining trials and channels with artifacts  
212 were removed manually. Across subjects, an average of 5 channels ( $\pm 2$  SD) were rejected.  
213 Bad channels were excluded from the whole data set. A detailed report of remaining number  
214 of trials per condition for each participant can be found in supplementary material (see SI  
215 Appendix Table S1). Finally, in all further analyses and within each sensory modality for each  
216 subject, an equal number of detected and undetected trials was randomly selected to prevent  
217 any bias across conditions (64).

218

### 219 Source analyses

220 Neural activity evoked by stimulus onset was investigated by computing event-related  
221 fields (ERF). For all source-level analyses, the preprocessed data was 30Hz lowpass-filtered  
222 and projected to source-level using an LCMV beamformer analysis (65). For each participant,  
223 realistically shaped, single-shell headmodels (66) were computed by co-registering the  
224 participants' headshapes either with their structural MRI or – when no individual MRI was  
225 available (3 participants and 2 participants, for the initial experiment and the control  
226 experiment respectively) – with a standard brain from the Montreal Neurological Institute (MNI,  
227 Montreal, Canada), warped to the individual headshape. A grid with 1.5 cm resolution based  
228 on an MNI template brain was morphed into the brain volume of each participant. A common  
229 spatial filter (for each grid point and each participant) was computed using the leadfields and  
230 the common covariance matrix, taking into account the data from both conditions (detected  
231 and undetected; or catch and sham) for each sensory modality separately. The covariance  
232 window for the beamformer filter calculation was based on 200 ms pre- to 500 ms post-  
233 stimulus. Using this common filter, the spatial power distribution was then estimated for each



234 trial separately. The resulting data were averaged relative to the stimulus onset in all  
235 conditions (detected, undetected, catch and sham) for each sensory modality. Only for  
236 visualization purposes a baseline correction was applied to the averaged source-level data by  
237 subtracting a time-window from 200 ms pre-stimulus to stimulus onset. Based on a significant  
238 difference between event-related fields of the two conditions over time for each sensory  
239 modality, the source localization was performed restricted to specific time-windows of interest.  
240 All source images were interpolated from the original resolution onto an inflated surface of an  
241 MNI template brain available within the Caret software package (67). The respective MNI  
242 coordinates and labels of localized brain regions were identified with an anatomical brain atlas  
243 (AAL atlas; (68)) and a network parcellation atlas (29).

244

#### 245 Multivariate Pattern Analysis (MVPA) decoding

246 MVPA decoding was performed for the period 0 to 500 ms after stimulus onset based  
247 on normalized (z-scored) single trial source data downsampled to 100Hz (i.e. time steps of 10  
248 ms). We used multivariate pattern analysis as implemented in CoSMoMVPA (63) in order to  
249 identify when and what kind of common network between sensory modality is activated during  
250 the near-threshold detection task. We defined two classes for the decoding related to the task  
251 behavioral outcome (detected and undetected). For decoding within the same sensory  
252 modality, single trial source data were randomly assigned to one of two chunks (half of the  
253 original data).

254 For decoding of all sensory modalities together, single trial source data were pseudo-  
255 randomly assigned to one of the two chunks with half of the original data for each sensory  
256 modality in each chunk. Data were classified using a 2-fold cross-validation procedure, where  
257 a Bayes-Naive classifier predicted trial conditions in one chunk after training on data from the  
258 other chunk. For decoding between different sensory modality, single trial source data of one  
259 modality were assigned to one testing chunk and the trials from other modalities were  
260 assigned to the training chunk. The number of target categories (e.g. detected / undetected)

261 was balanced in each training partition and for each sensory modality. Training and testing  
262 partitions always contained different sets of data.

263 First, the temporal generalization method was used to explore the ability of each  
264 classifier across different time points in the training set to generalize to every time point in the  
265 testing set (21). In this analysis we used local neighborhoods features in time space (time  
266 radius of 10ms: for each time step we included as additional features the previous and next  
267 time sample data point). We generated temporal generalization matrices of task decoding  
268 accuracy (detected/undetected), mapping the time at which the classifier was trained against  
269 the time it was tested. Generalization of decoding accuracy over time was calculated for all  
270 trials and systematically depended on a specific between or within sensory modality decoding.  
271 The reported average accuracy of the classifier for each time point corresponds to the group  
272 average of individual effect-size: the ability of classifiers to discriminate ‘detected’ from  
273 ‘undetected’ trials. We summarized time generalization by keeping only significant accuracy  
274 for each sensory modalities decoding. Significant classifiers’ accuracies were normalized  
275 between 0 and 1:

$$276 \quad y_t = \frac{x_t - \min(x)}{\max(x) - \min(x)} \quad (1)$$

277 Where  $x$  is a variable of all significant decoding accuracies and  $x_t$  is a given significant  
278 accuracy at time  $t$ . Normalized accuracies ( $y_t$ ) were then averaged across significant testing  
279 time and decoding conditions. The number of significant classifier generalization across  
280 testing time points and the relevant averaged normalized accuracies were reported along  
281 training time dimension (see Figure 3B and 5B). For all significant time points previously  
282 identified we performed a ‘searchlight’ analysis across brain sources and time neighborhood  
283 structure. In this analysis we used local neighborhoods features in source and time space. We  
284 used a time radius of 10ms and a source radius of 3 cm. All significant searchlight accuracy  
285 results were averaged over time and only the maximum 10% significant accuracy were  
286 reported on brain maps for each sensory modality decoding condition (Figure 4) or for all  
287 conditions together (Figure 5C).

288 Finally, we applied the same type of analysis to all sensory modalities by taking all  
289 blocks together with detected and undetected NT trials (equalized within each sensory  
290 modality). For the control experiment, we equalized trials based on the 2x2 design with  
291 detection report (“detected” or “undetected”) and type of response (“button press = response”  
292 or “no response”), so that we get the same number of trials inside each category (i.e. class)  
293 for each sensory modality. We performed similar decoding analysis by using different classes  
294 definition: either “detected vs. undetected” or “response vs. no response” (SI Appendix, Figure  
295 S3B and C).

296

### 297 Statistical analysis

298 Detection rates for the experimental trials were statistically compared to those from the  
299 catch and sham trials, using a dependent-samples T-Test. Concerning the MEG data, the  
300 main statistical contrast was between trials in which participants reported a stimulus detection  
301 and trials in which they did not (detected vs. undetected).

302 The evoked response at the source level was tested at the group level for each of the  
303 sensory modalities. To eliminate polarity, statistics were computed on the absolute values of  
304 source-level event-related responses. Based on the global average of all grid points, we first  
305 identified relevant time periods with maximal difference between conditions (detected vs.  
306 undetected) by performing group analysis with sequential dependent T-tests between 0 and  
307 500 ms after stimulus onset using a sliding window of 30 ms with 10ms overlap. P-values were  
308 corrected for multiple comparisons using Bonferroni correction. Then, in order to derive the  
309 contributing spatial generators of this effect, the conditions ‘detected’ and ‘undetected’ were  
310 contrasted for the specific time periods with group statistical analysis using nonparametric  
311 cluster-based permutation tests with Monte Carlo randomization across grid points controlling  
312 for multiple comparisons (69).

313 The multivariate searchlight analysis results discriminating between conditions were  
314 tested at the group level by comparing the resulting individual accuracy maps against chance  
315 level (50%) using a non-parametric approach implemented in CoSMoMvPA (63) adopting

316 10,000 permutations to generate a null distribution. P-values were set at  $p < 0.005$  for cluster  
317 level correction to control for multiple comparisons using a threshold-free method for clustering  
318 (70), which has been used and validated for MEG/EEG data (38, 71). The time generalization  
319 results at the group level were thresholded using a mask with corrected  $z\text{-score} > 2.58$  (or  
320  $p_{\text{corrected}} < 0.005$ ) (Figure 3A and 5A). Time points exceeding this threshold were identified and  
321 reported for each training data time course to visualize how long time generalization was  
322 significant over testing data (Figure 3B and 5B). Significant accuracy brain maps resulting  
323 from the searchlight analysis on previously identified time points were reported for each  
324 decoding condition. The maximum 10% of averaged accuracies were depicted for each  
325 significant decoding cluster on brain maps (Figure 4 and 5).

326

327

## 328 **Results**

### 329 Behavior

330 We investigated participants' detection rate for NT, Sham and Catch trials separately  
331 for the initial and the control experiment. During the initial experiment participants had to wait  
332 for a response screen and press a button on each trial to report their perception (Figure 1A).  
333 During the control experiment, however a specific response screen was used to control for  
334 motor response mapping. At each trial the participants must use a different response mapping  
335 related to circle's color surrounding the question mark during response screen (see Figure  
336 1C). For the initial experiment and across all participants ( $N = 16$ ), detection rates for NT  
337 experimental trials were: 50% (SD: 11%) for auditory runs, 56% (SD: 12%) for visual runs and  
338 55% (SD: 8%) for tactile runs. The detection rates for the catch trials were 92% (SD: 11%) for  
339 auditory runs, 90% (SD: 12%) for visual runs and 96% (SD: 5%) for tactile runs. The mean  
340 false alarm rates in sham trials were 4% (SD: 4%) for auditory runs, 4% (SD: 4%) for visual  
341 runs and 4% (SD: 7%) for tactile runs (Figure 1B). Detection rates of NT experimental trials in  
342 all sensory modality significantly differed from those of catch trials (auditory:  $T_{15} = -14.44$ ,  $p$

343 < 0.001; visual:  $T_{15} = -9.47$ ,  $p < 0.001$ ; tactile:  $T_{15} = -20.16$ ,  $p < 0.001$ ) or sham trials  
344 (auditory:  $T_{15} = 14.66$ ,  $p < 0.001$ ; visual:  $T_{15} = 16.99$ ,  $p < 0.001$ ; tactile:  $T_{15} = 20.66$ ,  $p <$   
345  $0.001$ ). Similar results were observed for the control experiment across all participants ( $N =$   
346  $14$ ), detection rates for NT experimental trials were: 52% (SD: 17%) for auditory runs, 43%  
347 (SD: 17%) for visual runs and 42% (SD: 12%) for tactile runs. The detection rates for the catch  
348 trials were 97% (SD: 2%) for auditory runs, 95% (SD: 5%) for visual runs and 95% (SD: 4%)  
349 for tactile runs. The mean false alarm rates in sham trials were 11% (SD: 4%) for auditory  
350 runs, 7% (SD: 6%) for visual runs and 7% (SD: 6%) for tactile runs (Figure 1B). Detection rates  
351 of NT experimental trials in all sensory modality significantly differed from those of catch trials  
352 (auditory:  $T_{13} = -9.64$ ,  $p < 0.001$ ; visual:  $T_{13} = -10.78$ ,  $p < 0.001$ ; tactile:  $T_{13} = -14.75$ ,  $p <$   
353  $0.001$ ) or sham trials (auditory:  $T_{13} = 7.85$ ,  $p < 0.001$ ; visual:  $T_{13} = 6.24$ ,  $p < 0.001$ ; tactile:  
354  $T_{13} = 9.75$ ,  $p < 0.001$ ). Overall the behavioral results are comparable to other studies (27,  
355 28). Individual reaction-times and performances are reported in supplementary materials (see  
356 SI Appendix Table S2).  
357

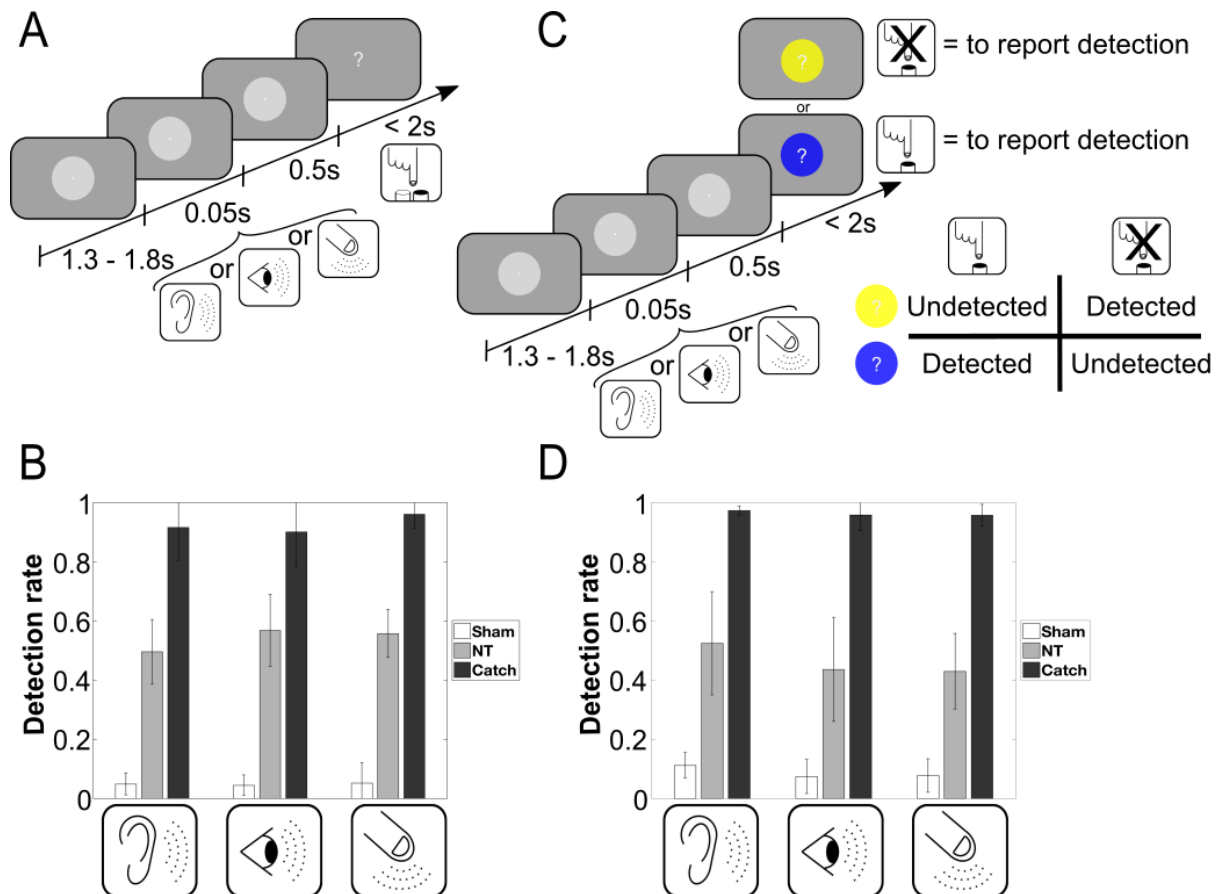

358  
359

360

361

362

363

364

365

366

367

368

369

370

371

372

373

374

375

376

377 Event-related neural activity

378 To compare poststimulus processing for ‘detected’ and ‘undetected’ trials, evoked  
379 responses were calculated at the source level for the initial experiment. As a general pattern  
380 over all sensory modalities, source-level event-related fields (ERF) averaged across all brain  
381 sources show that stimuli reported as detected resulted in pronounced post-stimulus neuronal  
382 activity, whereas unreported stimuli did not (Figure 2A). Similar general patterns were  
383 observed for the control experiment with identical univariate analysis (see SI Appendix Figure  
384 S2). ERFs were significantly different over the averaged time-course with specificity  
385 dependent on the sensory modality targeted by the stimulation. Auditory stimulations reported  
386 as detected elicit significant differences compared to undetected trials first between 190 and  
387 210 ms, then between 250 and 425ms and finally between 460 and 500 ms after stimulus  
388 onset (Figure 2A – left panel). Visual stimulation reported as detected elicits a large increase  
389 of ERF amplitude compared to undetected trials from 230-250ms and from 310-500 ms after  
390 stimulus onset (Figure 2A – middle panel). Tactile stimulation reported as detected elicits an  
391 early increase of ERF amplitude between 95 and 150 ms then a later activation between 190  
392 and 425 ms after stimulus onset (Figure 2A – right panel). Source localization of these specific  
393 time periods of interest were performed for each modality (Figure 2B). The auditory condition  
394 shows significant early source activity mainly localized to bilateral auditory cortices, superior  
395 temporal sulcus and right inferior frontal gyrus, whereas the late significant component was  
396 mainly localized to right temporal gyrus, bilateral precentral gyrus, left inferior and middle  
397 frontal gyrus. A large activation can be observed for the visual conditions including primary  
398 visual areas, fusiform and calcarine sulcus and a large fronto-parietal network activation  
399 including bilateral inferior frontal gyrus, inferior parietal sulcus and cingulate cortex. The early  
400 contrast of tactile evoked response shows a large difference in the brain activation including  
401 primary and secondary somatosensory areas, but also a large involvement of right frontal  
402 activity. The late contrast of tactile evoked response presents brain activation including left

403 frontal gyrus, left inferior parietal gyrus, bilateral temporal gyrus and supplementary motor  
404 area.  
405

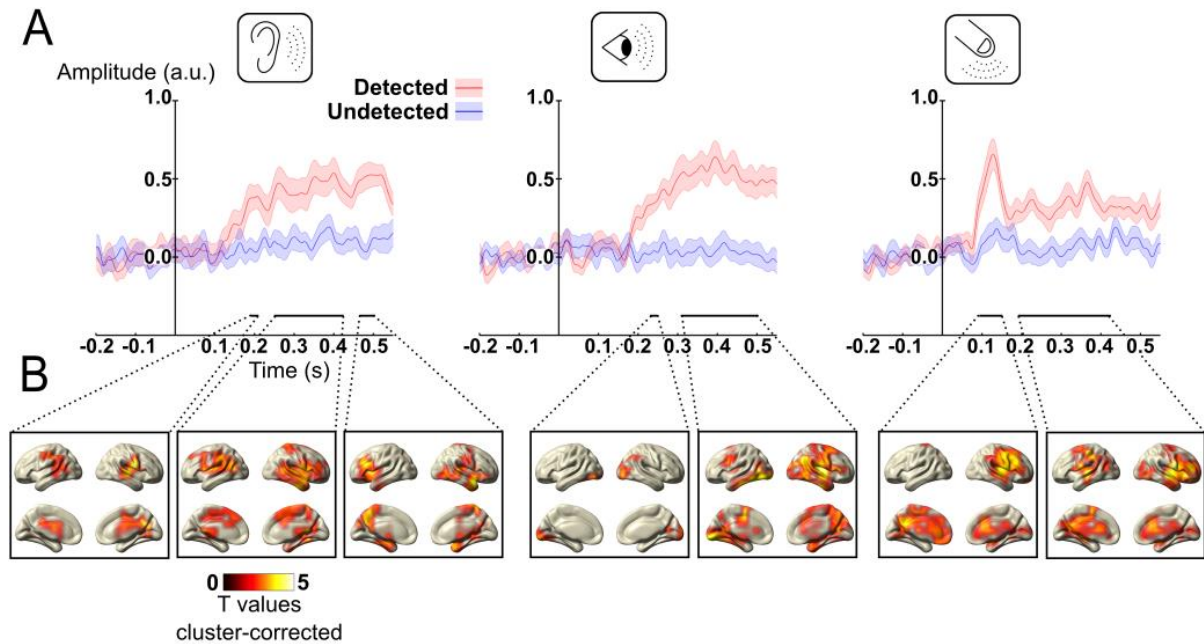

406  
407 **Figure 2. NT trials event-related responses for different sensory modalities: auditory (left panel), tactile**  
408 **(middle panel) and visual (right panel).** (A) Source-level absolute value (baseline-corrected for visualization  
409 purpose) of group event-related average (solid line) and standard error of the mean (shaded area) in the detected  
410 (red) and undetected (blue) condition for all brain sources. Significant time windows are marked with bottom solid  
411 lines (black line:  $p_{\text{Bonferroni-corrected}} < 0.05$ ) for the contrast detected vs. undetected trials. The relative source  
412 localization maps are represented in part B for the averaged time period. (B) Source reconstruction of the significant  
413 time period marked in part A for the contrast detected vs. undetected trials, masked at  $p_{\text{cluster-corrected}} < 0.05$ .

414

#### 415 Decoding and multivariate searchlight analysis across time and brain regions

416 We investigated the generalization of brain activation over time within and between the  
417 different sensory modalities. To this end, we performed a multivariate analysis of  
418 reconstructed brain source-level activity from the initial experiment. Time generalization  
419 analysis presented as a time-by-time matrix between 0 and 500 ms after stimulus onset shows  
420 significant decoding accuracy for each condition (Figure 3A). As can be seen on the black  
421 cells located on the diagonal in Figure 3A, cross-validation decoding was performed within the  
422 same sensory modality. However, off-diagonal red cells of Figure 3A represent decoding



423 analysis between different sensory modality. Inside each cell, data reported along the diagonal  
424 (dashed line) reveal average classifiers accuracy for a specific time point used for the training  
425 and testing procedure, whereas off-diagonal data reveal a potential classifier ability to  
426 generalize decoding based on different training and testing time points procedure. Indeed, we  
427 observed the ability of the same classifier trained on a specific time point to generalize its  
428 decoding performance over several time points (see off-diagonal significant decoding inside  
429 each cell of Figure 3A). In order to appreciate this result, we computed the average duration  
430 of significant decoding on testing time points based on the different training time points (Figure  
431 3B). On average, decoding within the same modality, the classifier generalization starts after  
432 200 ms and we observed significant maximum classification accuracy after 400 ms (see Figure  
433 3B - top panel).

434 Early differences specific to the tactile modality have been grasped by the classification  
435 analysis by showing significant decoding accuracy already after 100 ms without strong time  
436 generalization for this sensory modality, where auditory and visual conditions show only  
437 significant decoding starting around 250-300 ms after stimulus onset. Such an early dynamic  
438 specific to the tactile modality could explain off-diagonal accuracy for all between modalities  
439 decoding where the tactile modality was involved (Figure 3A). Interestingly, time generalization  
440 analysis concerning between sensory modality decoding (red cells in Figure 3A) revealed  
441 significant maximal generalization at around 400 ms (see Figure 3B - bottom panel). In  
442 general, the time-generalization analysis revealed time-clusters restricted to late brain activity  
443 with maximal decoding accuracy on average after 300 ms for all conditions. The similarity of  
444 this time-cluster over all three sensory modalities suggests the generality of such brain  
445 activation.

446 Restricted to the respective significant time clusters (Figure 3A), we investigated the  
447 underlying brain sources resulting from the searchlight analysis within and between conditions  
448 (Figure 4). The decoding within the same sensory modality revealed higher significant  
449 accuracy in relevant sensory cortex for each specific modality condition (see Figure 4; brain  
450 plots on diagonal). In addition, auditory modality searchlight decoding revealed also a strong

451 involvement of visual cortices (Figure 4: first row, first column), while somatosensory modality  
 452 decoding revealed parietal regions involvement such as precuneus (Figure 4: third row, third  
 453 column). However, decoding searchlight analysis between different sensory modalities  
 454 revealed higher decoding accuracy in fronto-parietal brain regions in addition to diverse  
 455 primary sensory regions (see Figure 4; brain plots off diagonal).

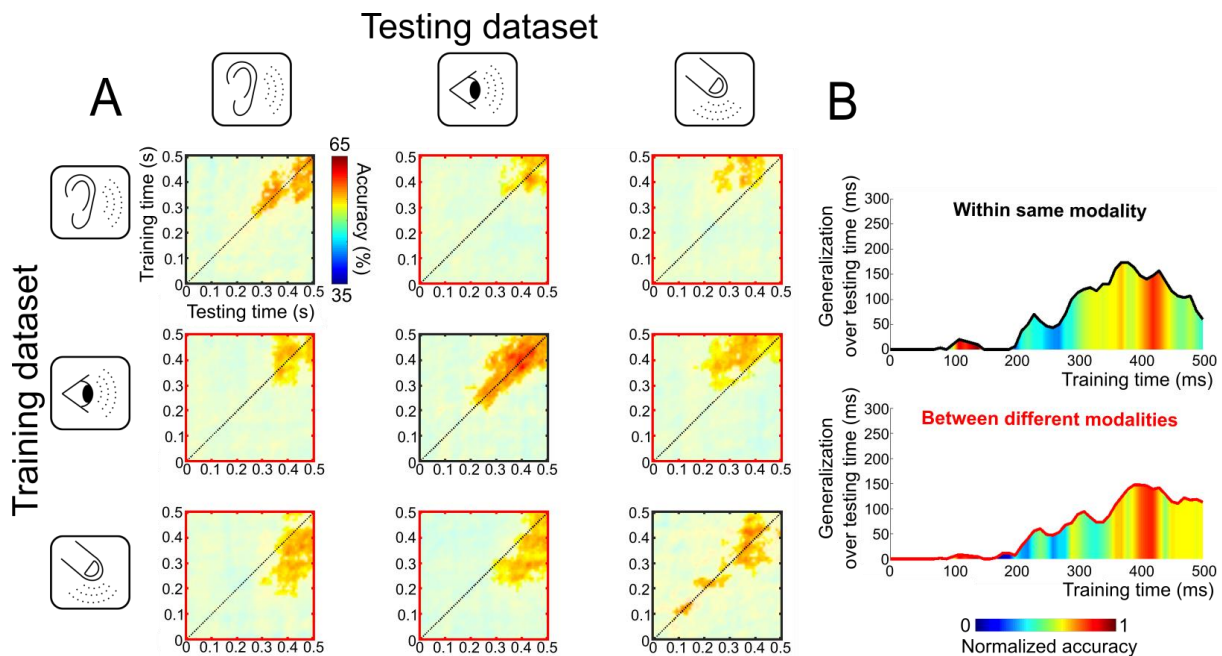

456  
 457 **Figure 3. Time-by-time generalization analysis within and between sensory modality (for NT trials).** 3x3  
 458 matrices of decoding results represented over time (from stimulation onset to 500 ms after). **(A)** Each cell presents  
 459 the result of the searchlight MVPA with time-by-time generalization analysis where classifier accuracy was  
 460 significantly above chance level (50%) (masked at  $p_{corrected} < 0.005$ ). For each temporal generalization matrix, a  
 461 classifier was trained at a specific time sample (vertical axis: training time) and tested on all time samples (horizontal  
 462 axis: testing time). The black dotted line corresponds to the diagonal of the temporal generalization matrix, i.e., a  
 463 classifier trained and tested on the same time sample. This procedure was applied for each combination of sensory  
 464 modality, i.e. presented on the first row is decoding analysis performed by classifiers trained on the auditory  
 465 modality and tested on auditory, visual or tactile (1<sup>st</sup>, 2<sup>nd</sup> and 3<sup>rd</sup> column respectively) for the two classes: detected  
 466 and undetected trials. The cells contoured with black line axes (on the diagonal) correspond to within the same  
 467 sensory modality decoding, whereas the cells contoured with red line axes correspond to between different  
 468 modalities decoding. **(B)** Summary of average time-generalization and decoding performance over time for all  
 469 within modality analysis (top panel: average based on the 3 black cells of part A) and between modalities analysis  
 470 (bottom panel: average based on the 6 red cells of part A). For each specific training time point on the x-axis the  
 471 average duration of classifier's ability to significantly generalize on testing time points was computed and reported

472 on the y-axis. Additionally, normalized average significant classifiers accuracies over all testing time for a specific  
 473 training time point is represented as a color scale gradient.

474

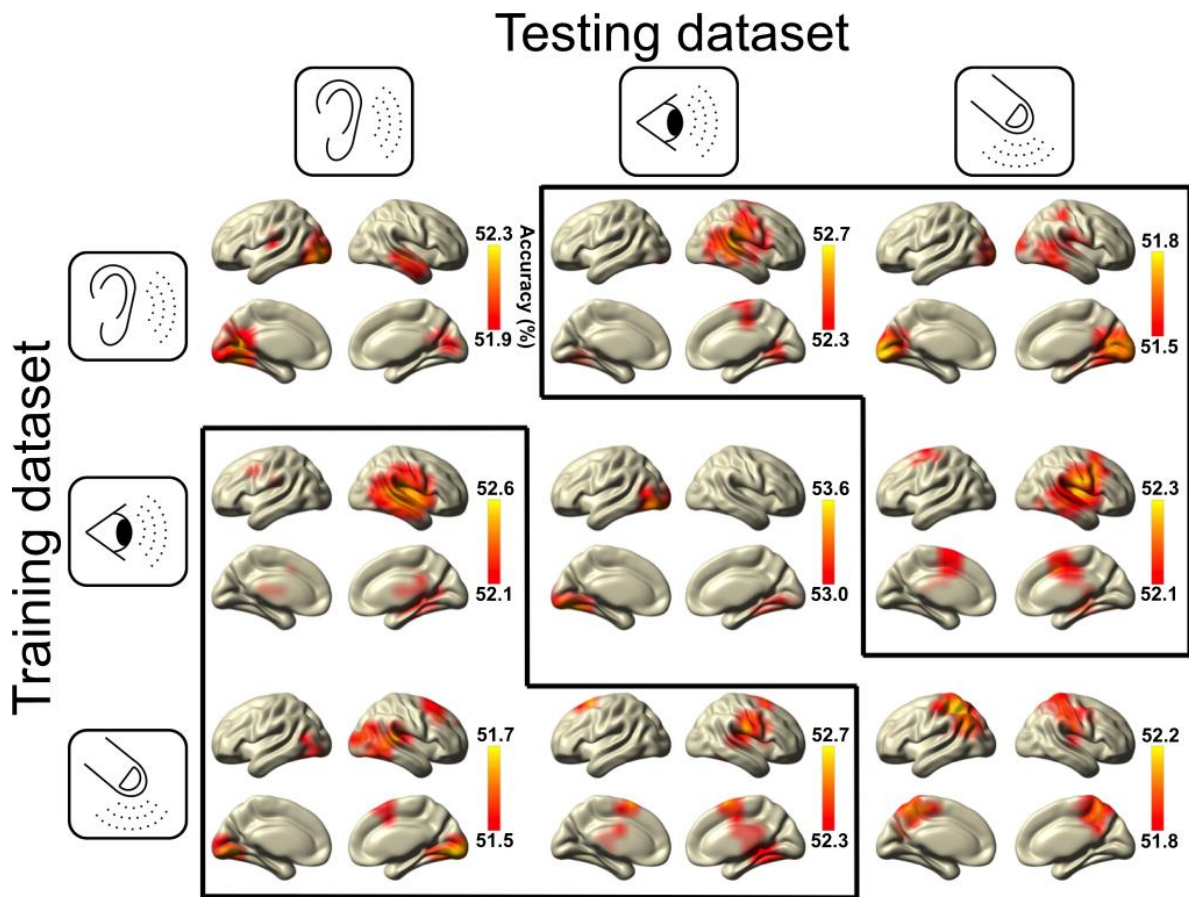

475 **Figure 4. Spatial distribution of significant searchlight MVPA decoding within and between sensory**  
 476 **modality.** Source brain maps for average decoding accuracy restricted to the related time-generalization significant  
 477 time-by-time cluster (cf. Figure 3A). Brain maps were thresholded by only showing 10% maximum significant  
 478 decoding accuracy for each respective time-by-time cluster. Dark solid lines separate all between sensory modality  
 479 decoding brain maps from the cross-validation within one sensory modality decoding analysis on the diagonal.  
 480

481

482 *Decoding and multivariate searchlight analysis over all sensory modalities*

483 We further investigated the decoding generalizability of brain activity patterns across  
 484 all sensory modalities in one analysis by decoding detected versus undetected trials over all  
 485 blocks together (Figure 5A). Initially, we performed this specific analysis with data from the  
 486 first experiment and separately with data from the control experiment in order to replicate our  
 487 findings and control for potential motor response bias (see SI Appendix Figure S3). By

488 delaying the response-mapping to after the stimulus presentation in a random fashion during  
489 the control experiment, neural patterns during relevant periods putatively cannot be  
490 confounded by response selection / preparation. Importantly, analysis performed on the  
491 control experiment used identical data in SI Appendix figure S3 B and C, but only trials  
492 assignment (i.e. 2 classes definition) for decoding was different: “detected versus undetected”  
493 (SI Appendix, Figure S3B) or “response versus no response” (SI Appendix, Figure S3C). Only  
494 decoding of conscious report (i.e. “detected versus undetected”) showed significant time-by-  
495 time clusters (SI Appendix, Figure S3 A&B). This result rules out a confounding influence of  
496 the motor report and again strongly suggests the existence of a common supramodal pattern  
497 related to conscious perception.

498 We investigated the similarity of time-generalization results by merging data from both  
499 experiments (see Figure 5A). We tested for significant temporal dynamics of brain activity  
500 patterns across all our data, taking into account that less stable or similar patterns would not  
501 survive group statistics. Overall the ability for one classifier to generalize across time seems  
502 to increase linearly after a critical time point around 100ms. We show that whereas the early  
503 patterns (<250ms) are rather short-lived, temporal generalizability increases showing stability  
504 values after ~350ms (Figure 5B). To follow-up on potential generators underlying these  
505 temporal patterns, we depicted the searchlight results from three specific time-windows (W1,  
506 W2 and W3) regarding the time-generalization decoding and the distribution of normalized  
507 accuracy over time (Figure 5C). W1 from stimulation onset to 250ms depicts the first significant  
508 searchlight decoding found in this analysis; W2 from 250ms to 350ms depicts the first  
509 generalization period where decoding accuracy is low; finally W3 from 350ms to 500ms  
510 depicts the second time-generalization period where higher decoding accuracy were found  
511 (Figure 5B). The depiction of the results highlights precuneus, insula, anterior cingulate cortex,  
512 frontal and parietal regions mainly involved during the first significant time-window (W1), while  
513 the second time-window (W2) main significant cluster is located over left precentral motor  
514 cortices. Interestingly the late time-window (W3) shows stronger decoding over primary  
515 sensory cortices where accuracy are the highest: lingual and calcarine sulcus, superior

516 temporal and Heschl gyrus and right postcentral gyrus (Figure 5C). The sources depicted by  
 517 the searchlight analysis, suggest strong overlaps with functional brain networks related to  
 518 attention and saliency detection (29), especially during the earliest time periods (W1 and W2)  
 519 (see SI Appendix, Figure S4).  
 520

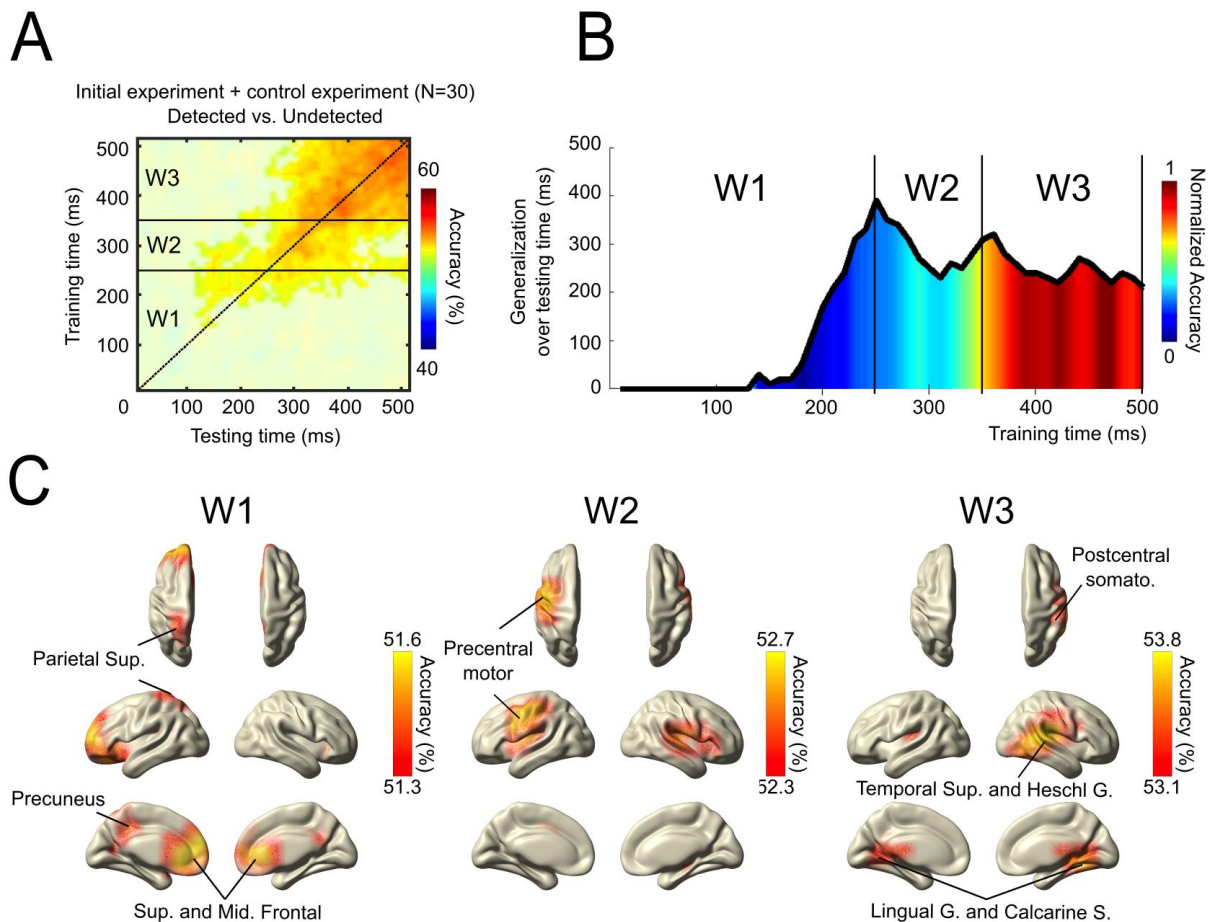

521  
 522  
 523 **Figure 5. Time-by-time generalization and brain searchlight decoding analysis across all sensory**  
 524 **modalities (for NT trials). Compiled results for both initial and control experiments. (A)** Decoding results  
 525 represented over time (from stimulation onset to 500 ms after. Result of the searchlight MVPA with time-by-time  
 526 generalization analysis of “detected” versus “undetected” trials across all sensory modalities. Figure shows the  
 527 time-clusters where classifier accuracy was significantly above chance level (50%) (masked at  $p_{corrected} < 0.005$ ).  
 528 The black dotted line corresponds to the diagonal of the temporal generalization matrix, i.e., a classifier trained and  
 529 tested on the same time sample. Horizontal black lines separate time windows (W1, W2 and W3) **(B)** Summary of  
 530 average time-generalization and decoding performance over time (A). For each specific training time point on the  
 531 x-axis the average duration of classifier’s ability to significantly generalize on testing time points was computed and  
 532 reported on the y-axis. Additionally, normalized average significant classifiers accuracies over all testing time for a

533 specific training time point is represented as a color scale gradient. Based on this summary three time windows  
534 were depicted to explore spatial distribution of searchlight decoding (W1 : [0 250]ms ; W2 : [250 350]ms ; W3 : [350  
535 500]ms). **(C)** Spatial distribution of significant searchlight MVPA decoding for the significant time clusters depicted  
536 in (A) and (B). Brain maps were thresholded by only showing 10% maximum significant ( $p_{\text{corrected}} < 0.005$ ) decoding  
537 accuracy for each respective time-by-time cluster.

538

539

## 540 **Discussion**

541 For a neural process to be a strong contender as a neural correlate of consciousness,  
542 it should show some generalization e.g. across sensory modalities. This has –despite being  
543 implicitly assumed- never been directly tested. To pursue this important issue, we investigated  
544 a standard NT experiment targeting three different sensory modalities in order to explore  
545 common spatio-temporal brain activity related to conscious perception using multivariate and  
546 searchlight analysis. Our findings focusing on the post-stimulus evoked responses are in line  
547 with previous studies for each specific sensory modality, showing stronger brain activation  
548 when the stimulation was reported as perceived (27, 28, 30). Importantly by exploiting the  
549 advantages of decoding, we provide for the first time direct evidence of common  
550 electrophysiological correlates of conscious access across sensory modalities.

551

### 552 *ERF time-course differences across sensory modalities*

553 Our first results suggest significant temporal and spatial differences when univariate  
554 contrast between ‘detected’ and ‘undetected’ trials were used to investigate sensory-specific  
555 evoked responses. At the source level, the global group average activity revealed different  
556 significant time periods according to the sensory modality targeted where modulations of  
557 evoked responses related to detected trials can be observed (Figure 2A). In the auditory and  
558 visual modalities, we found mainly significant differences after 200 ms. In the auditory domain,  
559 perception- and attention-modulated sustained responses around 200 ms from sound onset  
560 were found in bilateral auditory and frontal regions using MEG (31, 32). Using MEG, a previous

561 study confirmed awareness-related effects from 240 to 500 ms after target presentation during  
562 visual presentation (33).

563 Our results show early differences in the transient responses (for the contrast detected  
564 versus undetected) for the somatosensory domain compared to the other sensory modalities,  
565 and have been previously identified using EEG at around 100 and 200 ms (34). Moreover,  
566 previous MEG studies have shown early brain signal amplitude modulation (<200ms) related  
567 to tactile perception in NT tasks (28, 35, 36). Such differences are less pronounced regarding  
568 the contrast between catch and sham trials across sensory modality (see SI Appendix Figure  
569 S1). Early ERF difference for the tactile NT trials can be due to the experimental setup where  
570 auditory and visual targets stimulation emerged from a background stimulation (constant white  
571 noise and screen display) whereas tactile stimuli remain isolated transient sensory targets.  
572 Despite these differences the time generalization analysis was able to grasp similar brain  
573 activity occurring at different time scale across these three sensory modalities.

574 Source localizations performed with univariate contrasts for each sensory modality  
575 suggest differences in network activation with some involvement of similar brain regions in late  
576 time windows such as: inferior frontal gyrus, inferior parietal gyrus and supplementary motor  
577 area. However, qualitatively similar topographic patterns observed in such analysis cannot  
578 easily be interpreted as similar brain processes. The important question is whether these  
579 neural activity patterns within a specific sensory modality can be used to decode subjective  
580 report of the stimulation within a different sensory context. The multivariate decoding analysis  
581 we performed in the next analysis aimed to answer this question.

582

### 583 *Identification of common brain activity across sensory modalities*

584 Multivariate decoding analysis was used to refine spatio-temporal similarity across  
585 these different sensory systems. In general, stable characteristics of brain signals have been  
586 proposed as a transient stabilization of distributed cortical networks involved in conscious  
587 perception (37). Using the precise time resolution of MEG signal and time-generalization  
588 analysis, we investigated the stability and time dynamics of brain activity related to conscious

589 perception across sensory systems. The presence of similar brain activity can be revealed  
590 between modalities using such a technique, even if significant ERF modulation is distributed  
591 over time. As expected, between-modality time-generalization analysis involving tactile runs  
592 show off-diagonal significant decoding due to early significant brain activity for the tactile  
593 modality (Figure 3A). This result suggests the existence of early but similar brain activity  
594 patterns related to conscious perception in the tactile domain compared to auditory and visual  
595 modalities.

596 Generally, decoding results revealed a significant time cluster starting around 300 ms  
597 with high classifier accuracy that speaks in favor of a late neural response related to conscious  
598 report. Actually, we observed the ability of the same classifier trained on specific time points  
599 with a specific sensory modality condition to generalize its decoding performance over several  
600 time points with the same or another sensory modality. This result speaks in favor of  
601 supramodal brain activity patterns that are consistent and stable over time. In addition, the  
602 searchlight analysis across brain regions provides an attempt to depict brain network  
603 activation during these significant time-generalization clusters. Note that, as seen also in  
604 multiple other studies using decoding (22, 23, 38, 39), the average accuracy can be relatively  
605 low and yet remains significant at the group level. Note however that contrary to many other  
606 cognitive neuroscientific studies using decoding (39, 40), we do not apply the practice of  
607 "subaveraging" trials to create "pseudo"-single trials, which naturally boosts average decoding  
608 accuracy (41). Also, the statistical rigor of our approach is underlined by the fact that the  
609 reported decoding results are restricted to highly significant effects ( $P_{\text{corrected}} < 0.005$ ; see  
610 Methods section). Critically, we replicated our results -applying the identical very conservative  
611 statistical thresholds- within a second control experiment when looking at conscious  
612 perception report contrast independently from motor response activity (SI Appendix, Figure  
613 S3). Our results conform to those of previous studies in underlying the importance of late  
614 activity patterns as crucial markers of conscious access (7, 42) and decision-making  
615 processes (10, 43).



616 Furthermore in this study, we explored the brain regions underlying time dynamics of  
617 conscious report by using brain source searchlight decoding. Knowing the limitations of such  
618 MEG analysis, especially using low spatial resolution (3cm), we restricted depiction of results  
619 to the main 10% maximum decoding accuracy over all searchlight brain regions. Some of the  
620 brain regions found in our searchlight analysis, namely deep brain structures such as the  
621 insula and anterior cingulate cortex are shared with other functional brain networks such as  
622 the salience network (44, 45). Also the superior frontal and parietal cortex have been  
623 previously found to be activated by attention-demanding cognitive tasks (46). Hence, we would  
624 like to emphasize that one cannot conclude from our study that the observed network identified  
625 in figure 5C is exclusively devoted to conscious report. Brain networks identified in this study  
626 share common brain regions and dynamics with the attentional and salience networks that  
627 remain relevant mechanisms to performing a NT-task. Interestingly this part of the network  
628 seems to be more involved during the initial part of the process, prior to motor brain region  
629 involvement (Figure 5C and SI Appendix Figure S4).

630 Indeed, some brain regions involved in motor planning were identified with our analysis,  
631 such as precentral gyrus, and could in principle relate to the upcoming button-press to report  
632 the subjective perception of the stimulus. We specifically targeted such motor preparation bias  
633 within the control experiment, in which the participant was unable to predict a priori how to  
634 report a conscious percept (i.e. pressing or withholding a button press) until the response  
635 prompt appeared. Importantly, we did not find any significant decoding when trials used for  
636 the analysis were sorted under response type (e.g. with or without an actual button press  
637 from the participant) compared to subjective report of detection (see SI Appendix, Figure S3  
638 B and C). Such findings could speak in favor of generic motor planning (47) or decision  
639 processes related activity in such forced-choice paradigms (48, 49).

640

#### 641 Late involvement of all primary sensory cortices

642 Some within-modalities decoding results highlighted unspecific primary cortices  
643 involvement while decoding was performed on another sensory modality. For instance, during

644 auditory near-threshold stimulation, the main decoding accuracy of neural activity predicting  
645 conscious perception was found in auditory cortices but also in visual cortices (see Figure 4:  
646 first row, first column). Interestingly, our final analysis revealed and confirmed that primary  
647 sensory regions are strongly involved in decoding conscious perception across sensory  
648 modalities. Moreover, such brain regions were mainly found during the last time period  
649 investigated following the first main involvement of fronto-parietal areas (see Figure 5). These  
650 important results suggest that sensory cortices from a specific modality contain sufficient  
651 information to allow the decoding perceptual conscious access in another different sensory  
652 modality. These results suggest a late active role of primary cortices over three different  
653 sensory systems (Figure 5). One study reported efficient decoding of visual object categories  
654 in early somatosensory cortex using fMRI and multivariate pattern analysis (50). Another fMRI  
655 experiment suggested that sensory cortices appear to be modulated via a common  
656 supramodal frontoparietal network, attesting to the generality of attentional mechanism toward  
657 expected auditory, tactile and visual information (51). However, in our study we demonstrate  
658 how local brain activity from different sensory regions reveal a specific dynamic allowing  
659 generalization over time to decode the behavioral outcome of a subjective perception in  
660 another sensory modality. These results speak in favor of intimate cross-modal interactions  
661 between modalities in perception (52).

662         Finally, our results suggest that primary sensory regions remain important at late  
663 latency after stimulus onset for resolving stimulus perception over different sensory modalities.  
664 We propose that this network could enhance the processing of behaviorally relevant signals,  
665 here the sensory targets. Although the integration of classically unimodal primary sensory  
666 cortices into a processing hierarchy of sensory information is well established (53), some  
667 studies suggest multisensory roles of primary cortical areas (54, 55).

668         Today it remains unknown how such multisensory responses could be related to an  
669 individual's unisensory conscious percepts in humans. Since sensory modalities are usually  
670 interwoven in real life, our findings of a supramodal network that may subserve both conscious

671 access and attentional functions have a higher ecological validity than results from previous  
672 studies on conscious perception for single sensory modality.

673         Actually, our results are in line with an ongoing debate in neuroscience asking to what  
674 extent multisensory integration emerges already in primary sensory areas (55, 56). Animal  
675 studies provided compelling evidence suggesting that the neocortex is essentially  
676 multisensory (57). Here our findings speak in favor of a multisensory interaction in primary and  
677 associative cortices. Interestingly a previous an fMRI study by using multivariate decoding  
678 revealed distinct mechanisms governing audiovisual integration in primary and associative  
679 cortices needed for spatial orienting and interactions in a multisensory world (58).

680

### 681 Conclusion

682         We successfully characterized common patterns over time and space suggesting  
683 generalization of consciousness-related brain activity across different sensory NT tasks. Our  
684 study paves the way for future investigation using techniques with more precise spatial  
685 resolution such as functional magnetic resonance imaging to depict in detail the brain network  
686 involved. However, to our knowledge this is the first study to report significant spatio-temporal  
687 decoding across different sensory modalities near-threshold perception experiment. Indeed,  
688 our results speak in favor of the existence of stable and supramodal brain activity patterns,  
689 distributed over time and involving seemingly task-unrelated primary sensory cortices. The  
690 stability of brain activity patterns over different sensory modalities presented in this study is,  
691 to date, the most direct evidence of a common network activation leading to conscious access  
692 (2). Moreover, our findings add to recent remarkable demonstrations of applying decoding and  
693 time generalization methods to MEG (21–23, 59), and show a promising application of MVPA  
694 techniques to source level searchlight analysis with a focus on the temporal dynamics of  
695 conscious perception.

696

697

## 698 **Acknowledgements**

699 This work was supported by the European Research Council (WIN2CON, ERC StG 283404).

700 We thank Julia Frey for her great support during data collection.

701

## 702 **Author contributions**

703 G.S. and N.W. conceived the approach. G.S., G.P. and T.H. implemented the experiment.

704 G.S. and M.F. collected the data. G.S. analyzed the data. G.S. and N.W. wrote the manuscript.

705 All authors approved the current manuscript.

706

707

## 708 **Resource sharing and data availability**

709 Further information and requests for resources or data should be directed to and will be fulfilled

710 by the corresponding author.

711

## 712 **References**

- 713 1. Crick F, Koch C (2003) A framework for consciousness. *Nat Neurosci* 6(2):119–126.  
714 2. Dehaene S, Changeux J-P (2011) Experimental and Theoretical Approaches to  
715 Conscious Processing. *Neuron* 70(2):200–227.  
716 3. Naghavi HR, Nyberg L (2005) Common fronto-parietal activity in attention, memory,  
717 and consciousness: Shared demands on integration? *Consciousness and Cognition*  
718 14(2):390–425.  
719 4. Foley JM, Legge GE (1981) Contrast detection and near-threshold discrimination in  
720 human vision. *Vision Research* 21(7):1041–1053.  
721 5. Ruhnau P, Hauswald A, Weisz N (2014) Investigating ongoing brain oscillations and  
722 their influence on conscious perception – network states and the window to  
723 consciousness. *Front Psychol* 5:1230.  
724 6. Lamme VAF (2006) Towards a true neural stance on consciousness. *Trends in*  
725 *Cognitive Sciences* 10(11):494–501.  
726 7. Dehaene S, Changeux J-P, Naccache L, Sackur J, Sergent C (2006) Conscious,  
727 preconscious, and subliminal processing: a testable taxonomy. *Trends in Cognitive*  
728 *Sciences* 10(5):204–211.  
729 8. Andersen LM, Pedersen MN, Sandberg K, Overgaard M (2016) Occipital MEG Activity  
730 in the Early Time Range (<300 ms) Predicts Graded Changes in Perceptual  
731 Consciousness. *Cereb Cortex* 26(6):2677–2688.  
732 9. Brancucci A, Lugli V, Perrucci MG, Gratta CD, Tommasi L (2014) A frontal but not  
733 parietal neural correlate of auditory consciousness. *Brain Struct Funct* 221(1):463–472.  
734 10. Joos K, Gilles A, Van de Heyning P, De Ridder D, Vanneste S (2014) From sensation

- 735 to percept: The neural signature of auditory event-related potentials. *Neuroscience &*  
736 *Biobehavioral Reviews* 42:148–156.
- 737 11. Auksztulewicz R, Spitzer B, Blankenburg F (2012) Recurrent Neural Processing and  
738 Somatosensory Awareness. *J Neurosci* 32(3):799–805.
- 739 12. Auksztulewicz R, Blankenburg F (2013) Subjective Rating of Weak Tactile Stimuli Is  
740 Parametrically Encoded in Event-Related Potentials. *J Neurosci* 33(29):11878–11887.
- 741 13. Tallon-Baudry C (2012) On the Neural Mechanisms Subserving Consciousness and  
742 Attention. *Front Psychol* 2:397.
- 743 14. van Gaal S, Lamme VAF (2012) Unconscious High-Level Information Processing:  
744 Implication for Neurobiological Theories of Consciousness. *The Neuroscientist*  
745 18(3):287–301.
- 746 15. Baars BJ (2005) Global workspace theory of consciousness: toward a cognitive  
747 neuroscience of human experience. *Progress in Brain Research* (Elsevier), pp 45–53.
- 748 16. Dehaene S, Charles L, King J-R, Marti S (2014) Toward a computational theory of  
749 conscious processing. *Current Opinion in Neurobiology* 25:76–84.
- 750 17. Sergent C, Baillet S, Dehaene S (2005) Timing of the brain events underlying access to  
751 consciousness during the attentional blink. *Nat Neurosci* 8(10):1391–1400.
- 752 18. Fisch L, et al. (2009) Neural “Ignition”: Enhanced Activation Linked to Perceptual  
753 Awareness in Human Ventral Stream Visual Cortex. *Neuron* 64(4):562–574.
- 754 19. Melloni L, Schwiedrzik CM, Müller N, Rodriguez E, Singer W (2011) Expectations  
755 Change the Signatures and Timing of Electrophysiological Correlates of Perceptual  
756 Awareness. *J Neurosci* 31(4):1386–1396.
- 757 20. Cichy RM, Pantazis D, Oliva A (2014) Resolving human object recognition in space and  
758 time. *Nat Neurosci* 17(3):455–462.
- 759 21. King J-R, Dehaene S (2014) Characterizing the dynamics of mental representations:  
760 the temporal generalization method. *Trends in Cognitive Sciences* 18(4):203–210.
- 761 22. Tucciarelli R, Turella L, Oosterhof NN, Weisz N, Lingnau A (2015) MEG Multivariate  
762 Analysis Reveals Early Abstract Action Representations in the Lateral Occipitotemporal  
763 Cortex. *J Neurosci* 35(49):16034–16045.
- 764 23. Wutz A, Muschter E, van Koningsbruggen MG, Weisz N, Melcher D (2016) Temporal  
765 Integration Windows in Neural Processing and Perception Aligned to Saccadic Eye  
766 Movements. *Current Biology* 26(13):1659–1668.
- 767 24. Kriegeskorte N, Goebel R, Bandettini P (2006) Information-based functional brain  
768 mapping. *PNAS* 103(10):3863–3868.
- 769 25. Haynes J-D, et al. (2007) Reading Hidden Intentions in the Human Brain. *Current*  
770 *Biology* 17(4):323–328.
- 771 26. Sandberg K, Andersen LM, Overgaard M (2014) Using multivariate decoding to go  
772 beyond contrastive analyses in consciousness research. *Front Psychol* 5:1250.
- 773 27. Leske S, et al. (2015) Prestimulus Network Integration of Auditory Cortex Predisposes  
774 Near-Threshold Perception Independently of Local Excitability. *Cereb Cortex*  
775 25(12):4898–4907.
- 776 28. Frey JN, et al. (2016) The Tactile Window to Consciousness is Characterized by  
777 Frequency-Specific Integration and Segregation of the Primary Somatosensory Cortex.  
778 *Scientific Reports* 6:20805.
- 779 29. Gordon EM, et al. (2016) Generation and Evaluation of a Cortical Area Parcellation  
780 from Resting-State Correlations. *Cereb Cortex* 26(1):288–303.
- 781 30. Karns CM, Knight RT (2008) Intermodal Auditory, Visual, and Tactile Attention  
782 Modulates Early Stages of Neural Processing. *Journal of Cognitive Neuroscience*  
783 21(4):669–683.
- 784 31. Kauramäki J, et al. (2012) Two-Stage Processing of Sounds Explains Behavioral  
785 Performance Variations due to Changes in Stimulus Contrast and Selective Attention:  
786 An MEG Study. *PLOS ONE* 7(10):e46872.
- 787 32. Zoefel B, Heil P (2013) Detection of Near-Threshold Sounds is Independent of EEG  
788 Phase in Common Frequency Bands. *Front Psychol* 4:262.
- 789 33. Wyart V, Tallon-Baudry C (2008) Neural Dissociation between Visual Awareness and

- 790 Spatial Attention. *J Neurosci* 28(10):2667–2679.
- 791 34. Ai L, Ro T (2014) The phase of prestimulus alpha oscillations affects tactile perception.  
792 *Journal of Neurophysiology* 111(6):1300–1307.
- 793 35. Palva S, Linkenkaer-Hansen K, Näätänen R, Palva JM (2005) Early Neural Correlates  
794 of Conscious Somatosensory Perception. *J Neurosci* 25(21):5248–5258.
- 795 36. Wühle A, Mertiens L, Rüter J, Ostwald D, Braun C (2010) Cortical processing of near-  
796 threshold tactile stimuli: An MEG study. *Psychophysiology* 47(3):523–534.
- 797 37. Schurger A, Sarigiannidis I, Naccache L, Sitt JD, Dehaene S (2015) Cortical activity is  
798 more stable when sensory stimuli are consciously perceived. *PNAS* 112(16):E2083–  
799 E2092.
- 800 38. Turella L, et al. (2016) Beta band modulations underlie action representations for  
801 movement planning. *NeuroImage* 136:197–207.
- 802 39. Cichy RM, Khosla A, Pantazis D, Oliva A (2017) Dynamics of scene representations in  
803 the human brain revealed by magnetoencephalography and deep neural networks.  
804 *NeuroImage* 153:346–358.
- 805 40. Kaiser D, Oosterhof NN, Peelen MV (2016) The Neural Dynamics of Attentional  
806 Selection in Natural Scenes. *J Neurosci* 36(41):10522–10528.
- 807 41. Grootswagers T, Wardle SG, Carlson TA (2016) Decoding Dynamic Brain Patterns  
808 from Evoked Responses: A Tutorial on Multivariate Pattern Analysis Applied to Time  
809 Series Neuroimaging Data. *Journal of Cognitive Neuroscience* 29(4):677–697.
- 810 42. Sergent C, Dehaene S (2004) Neural processes underlying conscious perception:  
811 Experimental findings and a global neuronal workspace framework. *Journal of*  
812 *Physiology-Paris* 98(4–6):374–384.
- 813 43. Polich J (2007) Updating P300: An integrative theory of P3a and P3b. *Clinical*  
814 *Neurophysiology* 118(10):2128–2148.
- 815 44. Kucyi A, Hodaie M, Davis KD (2012) Lateralization in intrinsic functional connectivity of  
816 the temporoparietal junction with salience- and attention-related brain networks. *Journal*  
817 *of Neurophysiology* 108(12):3382–3392.
- 818 45. Chen T, Cai W, Ryali S, Supekar K, Menon V (2016) Distinct Global Brain Dynamics  
819 and Spatiotemporal Organization of the Salience Network. *PLOS Biol* 14(6):e1002469.
- 820 46. Menon V, Uddin LQ (2010) Saliency, switching, attention and control: a network model  
821 of insula function. *Brain Struct Funct* 214(5–6):655–667.
- 822 47. Rubia K, et al. (2001) Mapping Motor Inhibition: Conjunctive Brain Activations across  
823 Different Versions of Go/No-Go and Stop Tasks. *NeuroImage* 13(2):250–261.
- 824 48. Donner TH, Siegel M, Fries P, Engel AK (2009) Buildup of Choice-Predictive Activity in  
825 Human Motor Cortex during Perceptual Decision Making. *Current Biology* 19(18):1581–  
826 1585.
- 827 49. Mostert P, Kok P, de Lange FP (2015) Dissociating sensory from decision processes in  
828 human perceptual decision making. *Scientific Reports* 5:18253.
- 829 50. Smith FW, Goodale MA (2015) Decoding Visual Object Categories in Early  
830 Somatosensory Cortex. *Cereb Cortex* 25(4):1020–1031.
- 831 51. Langner R, et al. (2011) Modality-Specific Perceptual Expectations Selectively  
832 Modulate Baseline Activity in Auditory, Somatosensory, and Visual Cortices. *Cereb*  
833 *Cortex* 21(12):2850–2862.
- 834 52. Pooremaeil A, et al. (2014) Cross-modal effects of value on perceptual acuity and  
835 stimulus encoding. *PNAS* 111(42):15244–15249.
- 836 53. Felleman DJ, Essen DCV (1991) Distributed Hierarchical Processing in the Primate  
837 Cerebral Cortex. *Cereb Cortex* 1(1):1–47.
- 838 54. Lemus L, Hernández A, Luna R, Zainos A, Romo R (2010) Do Sensory Cortices  
839 Process More than One Sensory Modality during Perceptual Judgments? *Neuron*  
840 67(2):335–348.
- 841 55. Liang M, Mouraux A, Hu L, Iannetti GD (2013) Primary sensory cortices contain  
842 distinguishable spatial patterns of activity for each sense. *Nature Communications*  
843 4:1979.
- 844 56. Vetter P, Smith FW, Muckli L (2014) Decoding Sound and Imagery Content in Early

- 845 Visual Cortex. *Current Biology* 24(11):1256–1262.
- 846 57. Ghazanfar AA, Schroeder CE (2006) Is neocortex essentially multisensory? *Trends in*  
847 *Cognitive Sciences* 10(6):278–285.
- 848 58. Rohe T, Noppeney U (2016) Distinct Computational Principles Govern Multisensory  
849 Integration in Primary Sensory and Association Cortices. *Current Biology* 26(4):509–  
850 514.
- 851 59. King J-R, Pescetelli N, Dehaene S (2016) Brain Mechanisms Underlying the Brief  
852 Maintenance of Seen and Unseen Sensory Information. *Neuron* 92(5):1122–1134.
- 853 60. Kontsevich LL, Tyler CW (1999) Bayesian adaptive estimation of psychometric slope  
854 and threshold. *Vision Research* 39(16):2729–2737.
- 855 61. Brainard D (1997) The Psychophysics Toolbox. *Spatial Vision*:433–436.
- 856 62. Oostenveld R, et al. (2010) FieldTrip: Open Source Software for Advanced Analysis of  
857 MEG, EEG, and Invasive Electrophysiological Data, FieldTrip: Open Source Software  
858 for Advanced Analysis of MEG, EEG, and Invasive Electrophysiological Data.  
859 *Computational Intelligence and Neuroscience, Computational Intelligence and*  
860 *Neuroscience* 2011, 2011:e156869.
- 861 63. Oosterhof NN, Connolly AC, Haxby JV (2016) CoSMoMvPA: Multi-Modal Multivariate  
862 Pattern Analysis of Neuroimaging Data in Matlab/GNU Octave. *Front Neuroinform*:27.
- 863 64. Gross J, et al. (2013) Good practice for conducting and reporting MEG research.  
864 *NeuroImage* 65:349–363.
- 865 65. Veen BDV, Drongelen WV, Yuchtman M, Suzuki A (1997) Localization of brain  
866 electrical activity via linearly constrained minimum variance spatial filtering. *IEEE*  
867 *Transactions on Biomedical Engineering* 44(9):867–880.
- 868 66. Nolte G (2003) The magnetic lead field theorem in the quasi-static approximation and  
869 its use for magnetoencephalography forward calculation in realistic volume conductors.  
870 *Phys Med Biol* 48(22):3637.
- 871 67. Van Essen DC, et al. (2001) An Integrated Software Suite for Surface-based Analyses  
872 of Cerebral Cortex. *Journal of the American Medical Informatics Association* 8(5):443–  
873 459.
- 874 68. Tzourio-Mazoyer N, et al. (2002) Automated Anatomical Labeling of Activations in SPM  
875 Using a Macroscopic Anatomical Parcellation of the MNI MRI Single-Subject Brain.  
876 *NeuroImage* 15(1):273–289.
- 877 69. Maris E, Oostenveld R (2007) Nonparametric statistical testing of EEG- and MEG-data.  
878 *Journal of Neuroscience Methods* 164(1):177–190.
- 879 70. Smith SM, Nichols TE (2009) Threshold-free cluster enhancement: Addressing  
880 problems of smoothing, threshold dependence and localisation in cluster inference.  
881 *NeuroImage* 44(1):83–98.
- 882 71. Pernet CR, Latinus M, Nichols TE, Rousselet GA (2015) Cluster-based computational  
883 methods for mass univariate analyses of event-related brain potentials/fields: A  
884 simulation study. *Journal of Neuroscience Methods* 250:85–93.
- 885
